# Supplementary material
Source: publisher figshare collection journal article supplement (https://acs.figshare.com/ndownloader/files/7712161)
Supplement: Supplementary file 1 [file 7712161]

## Sheet: BSA-BP (Before SA)
Peptide	#PSM	DeNovoScoreOfMax	MSGFScoreOfMax	SpecEValueOfMin	EValueOfMin
APELLyYANKYy*NGVFQECCQAEDK	1	134	43	3.12224e-11	0.000146825
APELLYyANKYy*NGVFQECCQAEDK	1	134	43	3.12224e-11	0.000146825
CCTKPESERM*PCTEDYy*LSLILNR	1	132	39	7.99397e-10	0.00375774
DAFLGSFLyEySR	1	187	113	1.44839e-11	6.76045e-05
DAFLGSFLYEySR	8	191	168	1.01868e-16	4.75476e-10
DAFLGSFLYEYy*SR	6	190	163	7.72975e-16	3.60791e-09
ETyGDM*ADCCEK	2	107	97	6.64736e-16	3.09853e-09
ETyGDMADCCEK	7	145	145	6.45142e-18	3.0072e-11
ETYy*GDMADCCEK	4	114	95	5.77396e-17	2.69142e-10
FSALTPDETyVPK	2	158	118	1.10797e-14	5.1715e-08
FYAPELLYy*YANK	1	128	74	4.67753e-12	2.18034e-05
FYAPELLyYANK	4	159	142	2.69968e-15	1.2584e-08
HPEyAVSVLLR	1	124	120	8.78804e-15	4.08996e-08
HPyFYAPELLYYANK	2	134	112	9.53154e-18	4.45844e-11
LAKEyEATLEECCAK	3	173	92	4.11544e-13	1.92502e-06
LGEyGFQNALIVR	18	173	158	5.48913e-17	2.56209e-10
LGEYy*GFQNALIVR	9	168	143	6.67623e-17	3.11617e-10
MPCTEDyLSLILNR	10	216	211	1.36818e-18	6.39341e-12
MPCTEDYy*LSLILNR	2	205	200	1.21468e-18	5.6761e-12
RHPEyAVSVLLR	2	137	97	9.3966e-15	4.38004e-08
RHPyFYAPELLYYANK	2	152	92	2.34887e-13	1.09967e-06
RPCFSALTPDETyVPK	2	131	103	3.97476e-17	1.86086e-10
RPCFSALTPDETYy*VPK	1	130	81	4.42957e-14	2.07379e-07
yICDNQDTISSK	2	151	151	1.05515e-16	4.91837e-10
yLYEIAR	8	113	96	6.03482e-10	0.00277395
yNGVFQECCQAEDK	11	183	173	1.14454e-19	5.34834e-13
Yy*LQQCPFDEHVKLVNELTEFAK	1	182	78	8.80262e-14	4.1361e-07
Yy*LYEIAR	4	97	71	6.50688e-10	0.00299093
Yy*NGVFQECCQAEDK	12	177	169	2.37985e-20	1.11209e-13
y= BP-labeled tyrosine
y*= oxidated BP-labeled tyrosine
M*= oxidized methionine

## Sheet: BSA-DBP (Before SA)
Peptide	#PSM	DeNovoScoreOfMax	MSGFScoreOfMax	SpecEValueOfMin	EValueOfMin
DAFLGSFLYEySR	8	209	186	5.30047e-16	2.47403e-09
DVCKNyQEAKDAFLGSFLYEYSR	3	181	97	2.93421e-18	1.37929e-11
ETyGDM*ADCCEK	2	129	122	8.71431e-17	4.062e-10
ETyGDMADCCEK	13	153	153	6.45142e-18	3.0072e-11
FSALTPDETyVPK	1	145	108	4.53217e-14	2.11542e-07
FYAPELLyYANK	3	194	158	5.92575e-15	2.76217e-08
HPEyAVSVLLR	1	134	112	2.27035e-13	1.05662e-06
HPyFYAPELLYYANK	2	159	76	9.8119e-15	4.58958e-08
HPYFYAPELLyYANK	3	160	115	4.09149e-15	1.91382e-08
LAKEyEATLEECCAK	5	190	115	1.63295e-14	7.63824e-08
LGEyGFQNALIVR	24	189	160	6.30603e-17	2.94338e-10
M*PCTEDyLSLILNR	5	208	188	4.25618e-18	1.98888e-11
MPCTEDyLSLILNR	7	209	204	1.22964e-18	5.746e-12
RHPEyAVSVLLR	1	130	68	5.92447e-11	0.000276158
RHPyFYAPELLYYANK	1	154	108	3.38477e-15	1.58464e-08
RPCFSALTPDETyVPK	5	138	102	5.62312e-17	2.63257e-10
SQyLQQCPFDEHVK	1	120	92	3.8755e-16	1.81099e-09
yNGVFQECCQAEDK	14	190	189	2.07005e-20	9.67316e-14
y= DBP-labeled tyrosine
M*= oxidized methionine

## Sheet: Equimolar mix (Before SA)
Peptide	#PSM	DeNovoScoreOfMax	MSGFScoreOfMax	SpecEValueOfMin	EValueOfMin
APELLy`*YANKy`NGVFQECCQAEDK	1	159	69	4.57618e-14	2.15197e-07
APELLYy`*ANKy`NGVFQECCQAEDK	1	159	69	4.57618e-14	2.15197e-07
DAFLGSFLYEy`*SR	3	178	160	1.54992e-15	7.23435e-09
DAFLGSFLYEy`SR	7	193	168	8.06812e-16	3.76584e-09
DAFLGSFLYEySR	4	209	185	7.04115e-16	3.2865e-09
DVCKNyQEAKDAFLGSFLYEYSR	1	197	108	4.1224e-15	1.93783e-08
ETy`*GDMADCCEK	2	130	114	7.73953e-17	3.60763e-10
ETy`GDMADCCEK	7	156	141	6.45142e-18	3.0072e-11
ETyGDM*ADCCEK	2	117	105	3.44416e-16	1.60543e-09
ETyGDMADCCEK	7	155	155	6.45142e-18	3.0072e-11
FSALTPDETy`VPK	2	154	110	9.457e-14	4.41411e-07
FYAPELLyYANK	1	169	137	7.40172e-15	3.45017e-08
LAKEy`EATLEECCAK	2	182	106	2.94436e-14	1.37724e-07
LAKEyEATLEECCAK	3	182	131	1.59459e-15	7.4588e-09
LGEy`*GFQNALIVR	5	162	149	5.59936e-17	2.61354e-10
LGEy`GFQNALIVR	14	196	172	5.81354e-17	2.71351e-10
LGEyGFQNALIVR	16	199	166	6.88664e-17	3.21438e-10
LLYy`*ANKy`*NGVFQECCQAEDK	1	150	64	4.54126e-12	2.13282e-05
MPCTEDy`LSLILNR	8	214	203	1.23217e-18	5.75781e-12
MPCTEDyLSLILNR	3	214	205	1.39154e-18	6.50255e-12
RPCFSALTPDETy`VPK	2	144	106	9.08475e-16	4.25321e-09
RPCFSALTPDETyVPK	2	125	93	7.40314e-16	3.46593e-09
y`*LQQCPFDEHVKLVNELTEFAK	4	199	97	2.38292e-14	1.11967e-07
y`*NGVFQECCQAEDK	11	188	180	2.33582e-20	1.09151e-13
y`ICDNQDTISSK	2	154	151	1.0555e-16	4.92e-10
y`NGVFQECCQAEDK	6	189	178	1.13274e-19	5.29322e-13
yNGVFQECCQAEDK	12	192	191	2.83369e-20	1.32416e-13
y = DBP-labeled tyrosine
y`= BP-labeled tyrosine
y`*= oxidated BP-labeled tyrosine
M*= oxidized methionine

## Sheet: Equimolar mix (After SA)
Peptide	#PSM	DeNovoScoreOfMax	MSGFScoreOfMax	SpecEValueOfMin	EValueOfMin
ALTPDETyVPK	1	74	59	2.41136e-11	0.000112225
ANKyNGVFQECCQAEDK	1	112	48	4.04583e-11	0.000189562
CFSALTPDETy`VPK	1	79	29	1.05806e-09	0.00494421
CTEDy`LSLILNR	1	128	106	3.12057e-14	1.45459e-07
CTEDyLSLILNR	2	103	90	5.42238e-14	2.52754e-07
DAFLGSFLy`Ey`*SR	1	101	62	2.45591e-11	0.000114631
DAFLGSFLy`Ey`SR	1	87	51	1.26513e-11	5.90508e-05
DAFLGSFLYEy`*SR	10	172	117	2.5639e-16	1.19671e-09
DAFLGSFLYEy`SR	11	173	132	3.02024e-16	1.40972e-09
DAFLGSFLYEySR	9	141	136	2.95533e-16	1.37942e-09
DAFLGSFLyEYSR	1	32	10	9.63155e-11	0.000449559
DDPHACy`STVFDK	3	99	70	3.22375e-16	1.50471e-09
DDPHACySTVFDK	3	84	58	9.96679e-13	4.65206e-06
ETy`*GDM*ADCCEK	12	94	83	9.24196e-17	4.30796e-10
ETy`*GDMADCCEK	20	113	108	6.45142e-18	3.0072e-11
ETy`GDM*ADCCEK	13	95	74	1.45368e-17	6.77606e-11
ETy`GDMADCCEK	16	124	104	6.45142e-18	3.0072e-11
ETyGDM*ADCCEK	15	94	84	1.17943e-17	5.4977e-11
ETyGDMADCCEK	18	123	108	6.45142e-18	3.0072e-11
Ey`EATLEECCAK	2	107	103	1.87813e-16	8.75454e-10
EyEATLEECCAK	1	111	107	1.89374e-16	8.82729e-10
FSALTPDETy`*VPK	1	91	52	1.8364e-11	8.5715e-05
FSALTPDETy`VPK	6	102	63	4.12483e-12	1.92529e-05
FSALTPDETyVPK	4	99	62	1.1626e-13	5.42653e-07
FYAPELLy`*YANK	5	117	94	2.27282e-13	1.05943e-06
FYAPELLy`YANK	5	130	106	9.06038e-14	4.22332e-07
FYAPELLYy`ANK	1	104	87	4.73033e-14	2.20495e-07
FYAPELLyYANK	9	116	93	8.14274e-14	3.79558e-07
FYAPELLYyANK	1	112	90	2.08183e-12	9.70407e-06
HPEy`*AVSVLLR	1	82	75	9.34372e-15	4.34857e-08
HPEy`AVSVLLR	7	111	98	8.79085e-15	4.09126e-08
HPEyAVSVLLR	5	114	88	9.21529e-15	4.2888e-08
HPy`FYAPELLYYANK	3	123	79	8.14128e-12	3.80813e-05
HPYFy`APELLYYANK	1	90	32	3.41075e-09	0.015954
HPYFYAPELLy`*YANK	4	120	104	9.87446e-18	4.61884e-11
HPYFYAPELLy`YANK	5	115	87	6.88585e-18	3.2209e-11
HPyFYAPELLYYANK	3	128	70	1.29222e-13	6.04445e-07
HPYFYAPELLyYANK	3	123	104	3.98673e-17	1.86482e-10
LAKEy`*EATLEECCAK	1	95	67	2.12928e-14	9.95984e-08
LAKEy`EATLEECCAK	8	123	77	5.15491e-17	2.41124e-10
LAKEyEATLEECCAK	4	152	94	1.1997e-14	5.61165e-08
LGEy`*GFQNALIVR	34	150	122	5.48364e-17	2.55952e-10
LGEy`GFQNALIVR	33	154	125	5.55168e-17	2.59128e-10
LGEyGF	1	37	34	6.00064e-09	0.0271737
LGEyGFQNALIVR	47	128	116	6.51193e-17	3.03949e-10
LGSFLYEy`SR	2	107	86	5.55207e-12	2.57898e-05
LGSFLYEySR	2	112	94	5.65036e-12	2.62464e-05
M*PCTEDy`*LSLILNR	12	147	139	3.36825e-18	1.57395e-11
M*PCTEDy`LSLILNR	16	148	148	3.28593e-18	1.53548e-11
M*PCTEDyLSLILNR	18	160	146	3.28593e-18	1.53548e-11
MPCTEDy`*LSLILNR	12	163	142	4.44944e-18	2.07919e-11
MPCTEDy`LSLILNR	14	170	153	5.61369e-18	2.62323e-11
MPCTEDyLSLILNR	12	162	151	2.95158e-18	1.37925e-11
Ny`QEAK	1	63	49	1.77036e-09	0.00801703
RHPEy`*AVSVLLR	2	96	73	1.61295e-15	7.51847e-09
RHPEy`AVSVLLR	3	111	78	6.29869e-16	2.93601e-09
RHPEyAVSVLLR	6	101	79	1.68628e-15	7.86026e-09
RHPy`FYAPELLYYANK	1	100	62	8.4571e-14	3.95936e-07
RHPYFYAPELLy`*YANK	1	122	76	8.30816e-12	3.88963e-05
RHPYFYAPELLy`YANK	1	124	91	2.80993e-15	1.31552e-08
RHPYFYAPELLyYANK	3	99	78	6.64517e-17	3.11106e-10
RHPyFYAPELLYYANK	2	100	58	4.2984e-14	2.01238e-07
RPCFSALTPDETy`*VPK	5	122	76	4.54323e-14	2.127e-07
RPCFSALTPDETy`VPK	5	117	89	5.63101e-17	2.63627e-10
RPCFSALTPDETyVPK	5	105	84	3.16635e-17	1.48239e-10
SALTPDETy`VPK	1	97	65	2.43147e-11	0.000113338
SALTPDETyVPK	3	92	63	2.32924e-12	1.08573e-05
TEDyLSLILNR	1	73	59	3.49254e-12	1.62543e-05
VASLRETy`*GDMADCCEK	1	75	38	2.07614e-13	9.72746e-07
y`*ICDNQDTISSK	1	77	69	4.46342e-16	2.08054e-09
y`*Ly`EIAR	1	52	28	2.75153e-09	0.0126476
y`*LYEIAR	23	70	53	5.99393e-10	0.00275515
y`*NGVFQECCQAEDK	15	150	135	2.09852e-20	9.80622e-14
y`GFQNALIVR	1	84	68	5.09343e-12	2.36594e-05
y`ICDNQDTISSK	6	133	110	1.05515e-16	4.91837e-10
y`Ly`EIAR	1	73	26	3.22797e-09	0.0148376
y`LYEIAR	32	88	75	5.98682e-10	0.00275189
y`NGVFQECCQAEDK	8	141	136	2.86629e-20	1.33939e-13
yICDNQDTISSK	7	114	114	1.05515e-16	4.91837e-10
YLy`*EIAR	1	76	65	6.083e-10	0.00279609
yLYEIAR	28	88	76	5.98682e-10	0.00275189
yNGVFQECCQAEDK	12	136	136	9.30693e-20	4.34905e-13
y = DBP-labeled tyrosine
y`= BP-labeled tyrosine
y`*= oxidated BP-labeled tyrosine
M*= oxidized methionine
